# Supplementary material for: An electron-deficient naphthalene diimide-based metal–organic framework for detecting electron-rich molecules through photo-/chemo-induced chromism
Source: Royal Society of Chemistry journal article supplement (doi:10.1039/d1dt02555d), 2021-01-01
Supplement: d1dt02555d1.pdf [file d1dt02555d1.pdf]

Electronic Supplementary Material (ESI) for Dalton Transactions.

This journal is © The Royal Society of Chemistry 2021

# A Naphthalene Diimide-based Metal-organic Framework as An Electron-deficient Platform with Photochromic and Chemochromic Properties

Bohong Gao, Pengfei Hao,\* Gao-Peng Li, Junju Shen and Yunlong Fu\*

*Key Laboratory of Magnetic Molecules & Magnetic Information Materials Ministry of Education, School of Chemical and Material Science, Shanxi Normal University, Linfen 041004, China.*

## Supplementary Information Contents

|                                                                                                                                                                                                   |   |
|---------------------------------------------------------------------------------------------------------------------------------------------------------------------------------------------------|---|
| <b>1. Figures</b> .....                                                                                                                                                                           | 2 |
| <b>Fig. S1</b> The asymmetric unit of <b>1@DMF</b> (symmetry codes: A: $x, 0.5-y, -0.5+z$ ; B: $2-x, 0.5+y, 1.5-z$ ; C: $2-x, 1-y, 1-z$ ). .....                                                  | 2 |
| <b>Fig. S2</b> Thermo-gravimetric (TG) and Differential scanning calorimetry (DSC) curves of <b>1@DMF</b> . .....                                                                                 | 2 |
| <b>Fig. S3</b> TG curve of <b>1</b> and <b>1-Adsorbing DMF</b> . .....                                                                                                                            | 2 |
| <b>Fig. S4</b> Powder X-ray diffraction (PXRD) patterns for <b>1@DMF</b> , <b>1</b> and <b>1-Adsorbing DMF</b> at room temperature. ....                                                          | 3 |
| <b>Fig. S5</b> The UV-vis absorption spectra and switching cycles of coloration-decoloration processes of <b>1@DMF</b> (477nm) upon alternating UV light illumination and thermal treatment. .... | 3 |
| <b>Fig. S6</b> IR spectra of <b>1@DMF</b> , <b>1@DMF-P</b> and <b>1@DMF-P-80 °C</b> . ....                                                                                                        | 3 |
| <b>Fig. S7</b> UV-vis absorption spectra of <b>1</b> . ....                                                                                                                                       | 4 |
| <b>Fig. S8</b> EPR spectra of <b>1</b> and <b>1P</b> . ....                                                                                                                                       | 4 |
| <b>Fig. S9</b> The XPS core-level spectra of <b>1</b> and <b>1P</b> before and after UV light irradiation at room temperature. ....                                                               | 4 |
| <b>Fig. S10</b> TG spectra of <b>1@DMA</b> , <b>1@DMSO</b> , <b>1@NMP</b> and <b>1-Adsorbing DMF</b> . ....                                                                                       | 5 |
| <b>Fig. S11</b> UV-Vis absorption spectra (a), EPR spectra (b) and PXRD spectra (c) of <b>1@amines</b> (amines=AN, TEOA, DIP, TEA). ....                                                          | 5 |
| <b>2. Tables</b> .....                                                                                                                                                                            | 6 |
| <b>Table S1</b> . Crystallographic data and refinement of <b>1@DMF</b> . ....                                                                                                                     | 6 |
| <b>Table S2</b> . Selected bond lengths (Å) and angles (°) for <b>1@DMF</b> . ....                                                                                                                | 7 |
| <b>Table S3</b> . Hydrogen bonds of for <b>1@DMF</b> (Å and °). ....                                                                                                                              | 9 |

## 1. Figures

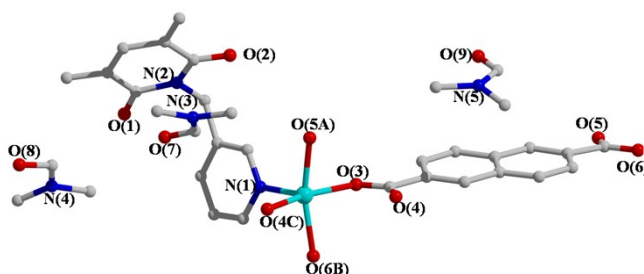

**Fig. S1** The asymmetric unit of **1@DMF** (symmetry codes: A:  $x, 0.5-y, -0.5+z$ ; B:  $2-x, 0.5+y, 1.5-z$ ; C:  $2-x, 1-y, 1-z$ ).

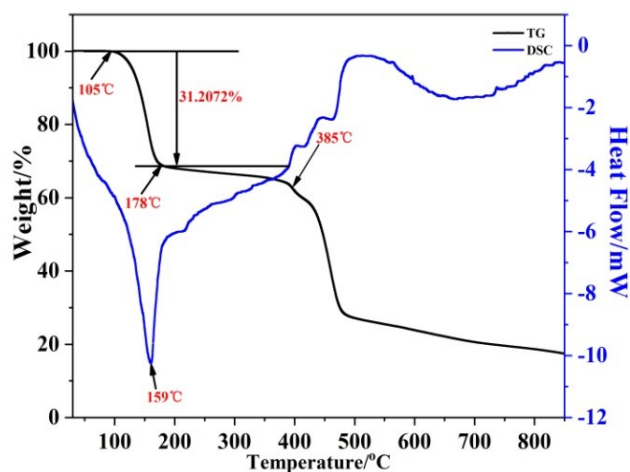

**Fig. 2** Thermo-gravimetric (TG) and Differential scanning calorimetry (DSC) curves of **1@DMF**.

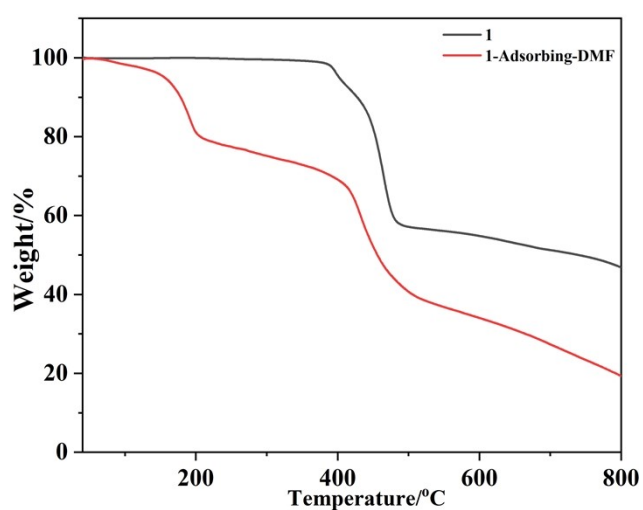

**Fig. S3** TG curve of **1** and **1-Adsorbing-DMF**.

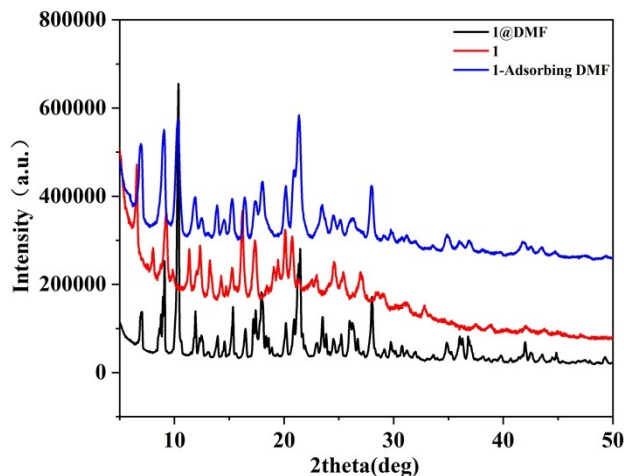

**Fig. S4** Powder X-ray diffraction (PXRD) patterns for **1@DMF**, **1** and **1-Adsorbing DMF** at room temperature.

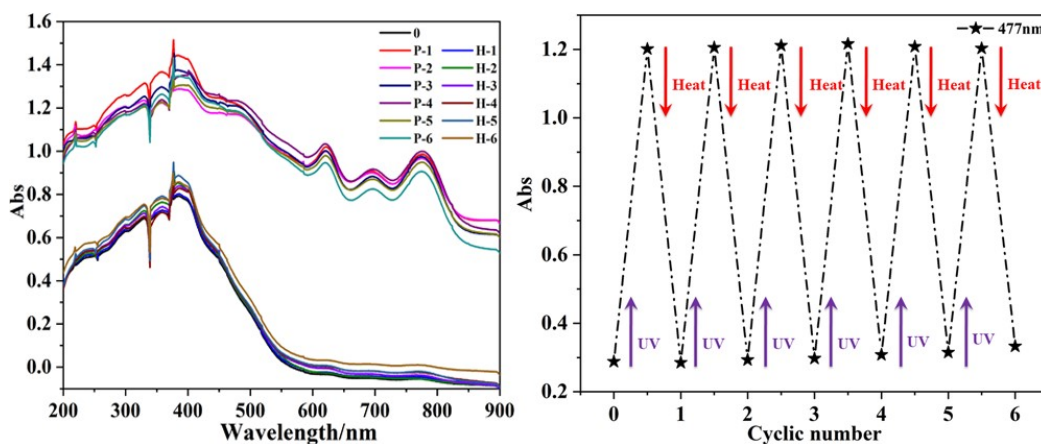

**Fig. S5** The UV-vis absorption spectra and switching cycles of coloration-decoloration processes of **1@DMF** (477nm) upon alternating UV light illumination and thermal treatment.

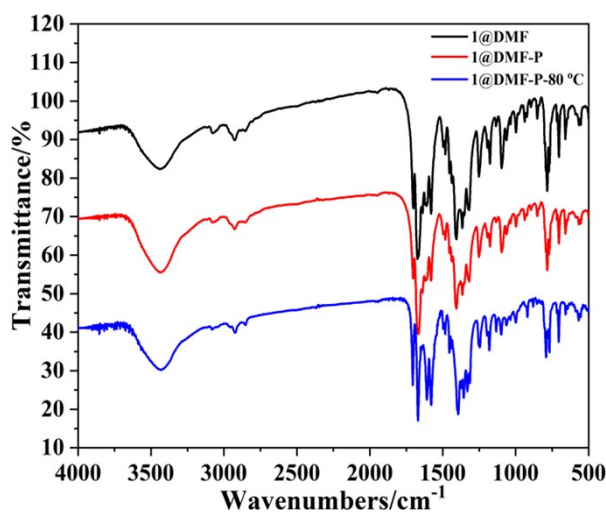

**Fig. S6** IR spectra of **1@DMF**, **1@DMF-P** and **1@DMF-P-80 °C**.

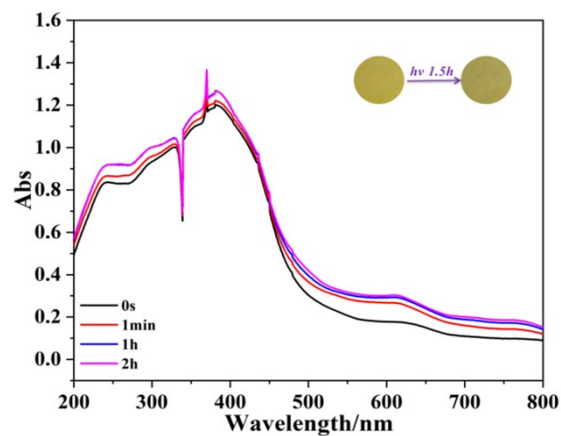

**Fig. S7** UV-vis absorption spectra of **1**.

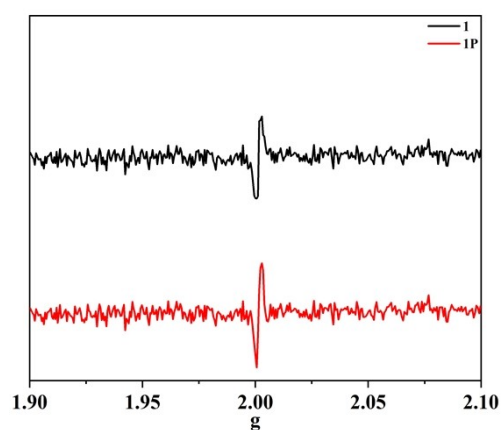

**Fig. S8** EPR spectra of **1** and **1P**.

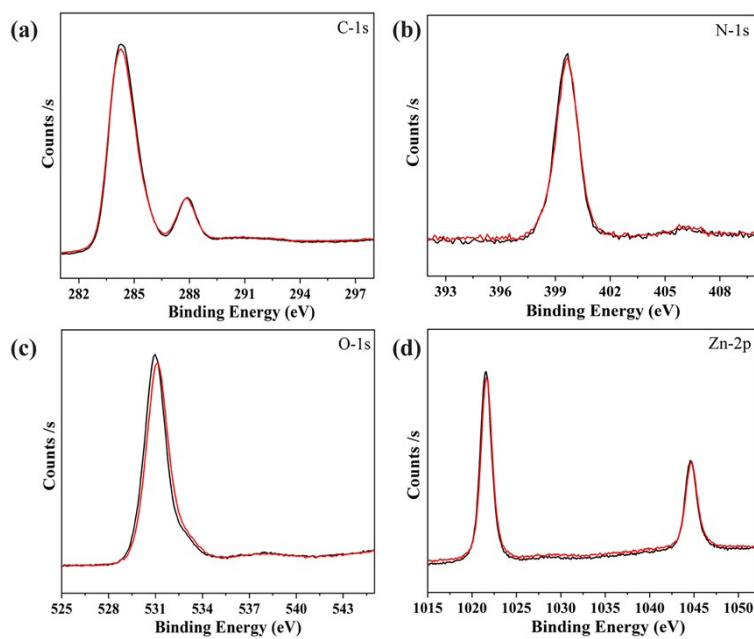

**Fig. S9** The XPS core-level spectra of **1** and **1P** before and after UV light irradiation at room temperature.

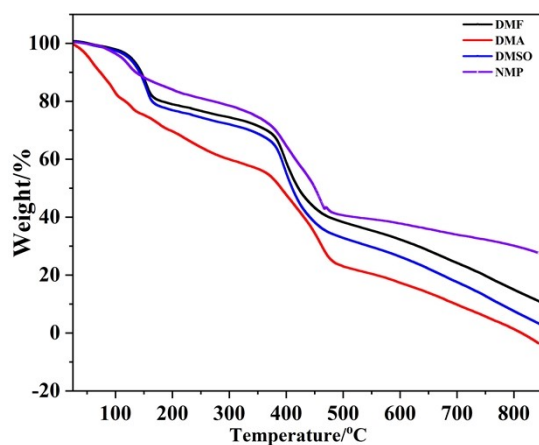

**Fig. S10** TG spectra of **1@DMA**, **1@DMSO**, **1@NMP** and **1-Adsorbing DMF**.

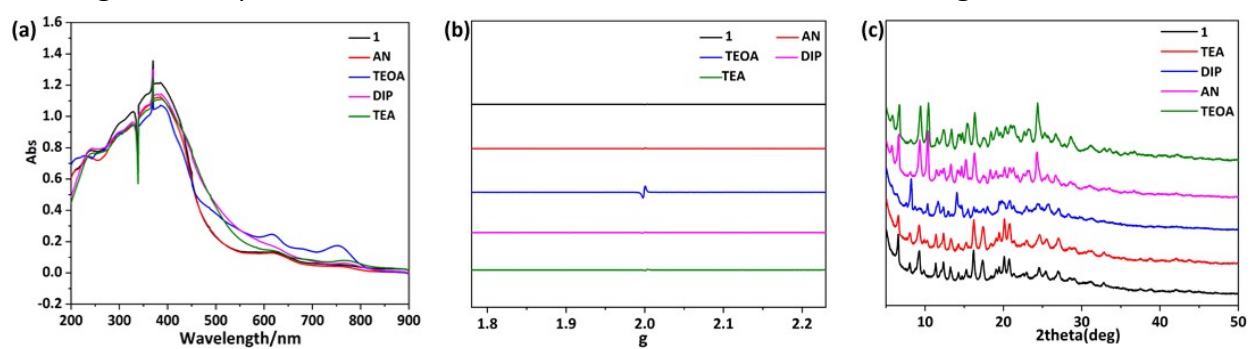

**Fig. S11** UV-Vis absorption spectra (a), EPR spectra (b) and PXRD spectra (c) of

**1@amines** (amines=AN, TEOA, DIP, TEA).

## 2. Tables

**Table S1.** Crystallographic data and refinement of **1@DMF**.

| Compounds                                                                                    | <b>1@DMF</b>                                                     |
|----------------------------------------------------------------------------------------------|------------------------------------------------------------------|
| CCDC code                                                                                    | 2052963                                                          |
| Temperature (K)                                                                              | 273(2)                                                           |
| Empirical formula                                                                            | C <sub>34</sub> H <sub>35</sub> N <sub>5</sub> O <sub>9</sub> Zn |
| Formula weight                                                                               | 723.04                                                           |
| Crystal size (mm)                                                                            | 0.673 × 0.398 × 0.078                                            |
| Crystal system                                                                               | monoclinic                                                       |
| Space group                                                                                  | <i>P2<sub>1</sub>/c</i>                                          |
| <i>a</i> (Å)                                                                                 | 10.4323(13)                                                      |
| <i>b</i> (Å)                                                                                 | 19.699(3)                                                        |
| <i>c</i> (Å)                                                                                 | 17.150(2)                                                        |
| $\alpha$ (°)                                                                                 | 90                                                               |
| $\beta$ (°)                                                                                  | 101.046(3)                                                       |
| $\gamma$ (°)                                                                                 | 90                                                               |
| <i>V</i> (Å <sup>3</sup> )                                                                   | 3459.1(7)                                                        |
| <i>Z</i>                                                                                     | 4                                                                |
| <i>D<sub>c</sub></i> (g cm <sup>-3</sup> )                                                   | 1.388                                                            |
| <i>F</i> (000)                                                                               | 1504.0                                                           |
| $\mu$ (mm <sup>-1</sup> )                                                                    | 0.771                                                            |
| Reflections collected                                                                        | 50746                                                            |
| Independent reflections                                                                      | 8609                                                             |
| <i>R</i> <sub>int</sub>                                                                      | 0.0232                                                           |
| Goodness-of-fit on <i>F</i> <sup>2</sup>                                                     | 1.074                                                            |
| <i>R</i> <sub>1</sub> / <i>wR</i> <sub>2</sub> , [ <i>I</i> ≥ 2σ( <i>I</i> )] <sup>a,b</sup> | 0.0406/ 0.1243                                                   |
| <i>R</i> <sub>1</sub> / <i>wR</i> <sub>2</sub> , (all data)                                  | 0.0536/ 0.1399                                                   |

**Table S2.** Selected bond lengths (Å) and angles (°) for **1@DMF**.

| <b>1@DMF</b>       |            |                     |          |
|--------------------|------------|---------------------|----------|
| Zn(1)-Zn(1) #1     | 2.9684(5)  | C(12)-C(13)#6       | 1.398(4) |
| Zn(1)-O(3)         | 2.0313(14) | C(13)-C(12)#6       | 1.399(4) |
| Zn(1)-O(4)#1       | 2.0454(15) | C(14)-C(15)         | 1.505(2) |
| Zn(1)-O(5)#2       | 2.0434(14) | C(15)-C(16)         | 1.410(3) |
| Zn(1)-O(6)#3       | 2.0442(14) | C(15)-C(20)         | 1.370(3) |
| Zn(1)-N(1)         | 2.0319(18) | C(16)-C(17)         | 1.363(3) |
| O(1)-C(7)          | 1.206(4)   | C(17)-C(18)         | 1.420(3) |
| O(2)-C(8)          | 1.214(3)   | C(18)-C(19)         | 1.415(3) |
| O(3)-C(14)         | 1.256(3)   | C(18)-C(24)         | 1.415(3) |
| O(4)-Zn(1)#1       | 2.0453(14) | C(19)-C(20)         | 1.416(3) |
| O(4)-C(14)         | 1.250(3)   | C(19)-C(21)         | 1.419(3) |
| O(5)-Zn(1)#4       | 2.0435(14) | C(21)-C(22)         | 1.361(3) |
| O(5)-C(25)         | 1.258(3)   | C(22)-C(23)         | 1.412(3) |
| O(6)-Zn(1)#5       | 2.0441(14) | C(23)-C(24)         | 1.370(3) |
| O(6)-C(25)         | 1.251(3)   | C(23)-C(25)         | 1.501(2) |
| N(1)-C(1)          | 1.332(3)   | O(7)-C(28)          | 1.202(7) |
| N(1)-C(5)          | 1.339(3)   | N(3)-C(26)          | 1.442(7) |
| N(2)-C(6)          | 1.476(3)   | N(3)-C(27)          | 1.375(5) |
| N(2)-C(7)          | 1.394(4)   | N(3)-C(28)          | 1.341(6) |
| N(2)-C(8)          | 1.387(3)   | O(8)-C(31)          | 1.248(9) |
| C(1)-C(2)          | 1.373(4)   | N(4)-C(29)          | 1.430(7) |
| C(2)-C(3)          | 1.379(5)   | N(4)-C(30)          | 1.351(8) |
| C(3)-C(4)          | 1.366(4)   | N(4)-C(31)          | 1.367(6) |
| C(4)-C(5)          | 1.383(3)   | O(9)-C(33)          | 1.192(7) |
| C(4)-C(6)          | 1.506(4)   | N(5)-C(32)          | 1.468(8) |
| C(7)-C(11)         | 1.484(4)   | N(5)-C(33)          | 1.426(7) |
| C(8)-C(9)          | 1.480(4)   | N(5)-C(34)          | 1.427(8) |
| C(9)-C(10)         | 1.406(4)   | O(9A)-C(33A)        | 1.215(8) |
| C(9)-C(13)         | 1.374(4)   | N(5A)-C(32A)        | 1.476(8) |
| C(10)-C(10)#6      | 1.416(5)   | N(5A)-C(33A)        | 1.421(8) |
| C(10)-C(11)        | 1.405(4)   | N(5A)-C(34A)        | 1.447(8) |
| C(11)-C(12)        | 1.370(4)   |                     |          |
| O(3)-Zn(1)-Zn(1)#1 | 84.82(5)   | C(10)-C(11)-C(7)    | 119.4(3) |
| O(3)-Zn(1)-O(4)#1  | 159.04(7)  | C(12)-C(11)-C(7)    | 120.2(3) |
| O(3)-Zn(1)-O(5)#2  | 87.54(7)   | C(12)-C(11)-C(10)   | 120.4(3) |
| O(3)-Zn(1)-O(6)#3  | 89.48(8)   | C(11)-C(12)-C(13)#6 | 120.5(3) |
| O(3)-Zn(1)-N(1)    | 103.63(7)  | C(9)-C(13)-C(12)#6  | 120.4(3) |

---

|                      |            |                     |            |
|----------------------|------------|---------------------|------------|
| O(4)#1-Zn(1)-Zn(1)#1 | 74.22(5)   | O(3)-C(14)-C(15)    | 117.13(19) |
| O(5)#2-Zn(1)-Zn(1)#1 | 79.39(5)   | O(4)-C(14)-O(3)     | 125.70(18) |
| O(5)#2-Zn(1)-O(4)#1  | 88.47(8)   | O(4)-C(14)-C(15)    | 117.17(18) |
| O(5)#2-Zn(1)-O(6)#3  | 159.25(7)  | C(16)-C(15)-C(14)   | 120.28(19) |
| O(6)#3-Zn(1)-Zn(1)#1 | 79.90(5)   | C(20)-C(15)-C(14)   | 119.79(19) |
| O(6)#3-Zn(1)-O(4)#1  | 87.01(7)   | C(20)-C(15)-C(16)   | 119.92(18) |
| N(1)-Zn(1)-Zn(1)#1   | 171.52(6)  | C(17)-C(16)-C(15)   | 120.8(2)   |
| N(1)-Zn(1)-O(4)#1    | 97.33(7)   | C(16)-C(17)-C(18)   | 120.5(2)   |
| N(1)-Zn(1)-O(5)#2    | 101.46(7)  | C(19)-C(18)-C(17)   | 118.93(18) |
| N(1)-Zn(1)-O(6)#3    | 99.20(7)   | C(19)-C(18)-C(24)   | 118.90(19) |
| C(14)-O(3)-Zn(1)     | 120.84(14) | C(24)-C(18)-C(17)   | 122.17(19) |
| C(14)-O(4)-Zn(1)#1   | 134.39(14) | C(18)-C(19)-C(20)   | 119.06(19) |
| C(25)-O(5)-Zn(1)#4   | 127.55(13) | C(18)-C(19)-C(21)   | 118.79(19) |
| C(25)-O(6)-Zn(1)#5   | 126.88(14) | C(20)-C(19)-C(21)   | 122.2(2)   |
| C(10)-C(9)-C(8)      | 119.8(2)   | C(34)-N(5)-C(32)    | 118.4(7)   |
| C(13)-C(9)-C(8)      | 120.1(3)   | O(9)-C(33)-N(5)     | 122.1(10)  |
| C(13)-C(9)-C(10)     | 120.1(3)   | C(33A)-N(5A)-C(32A) | 108.1(9)   |
| C(9)-C(10)-C(10)#6   | 119.4(3)   | C(33A)-N(5A)-C(34A) | 138.5(12)  |

---

<sup>1</sup>2-X,1-Y,1-Z; <sup>2</sup>+X,1/2-Y,-1/2+Z; <sup>3</sup>2-X,1/2+Y,3/2-Z; <sup>4</sup>+X,1/2-Y,1/2+Z; <sup>5</sup>2-X,-1/2+Y,3/2-Z; <sup>6</sup>1-X,1-Y,-Z

---



**Table S3.** Hydrogen bonds of for **1@DMF** (Å and °).

| Compound <b>1@DMF</b>                                      |        |          |          |        |
|------------------------------------------------------------|--------|----------|----------|--------|
| D-H...A                                                    | d(D-H) | d(H...A) | d(D...A) | <(DHA) |
| C(1)-H(1) ... O(6)                                         | 0.930  | 2.580    | 3.164    | 121.22 |
| C(5)-H(5) ... O(2)                                         | 0.930  | 2.605    | 3.276    | 129.47 |
| C(26)-H(26A) ... O(1)                                      | 0.960  | 2.605    | 3.258    | 125.49 |
| C(29)-H(29A) ... O(7)                                      | 0.960  | 2.474    | 3.432    | 175.51 |
| C(32)-H(32C) ... O(8)                                      | 0.960  | 2.620    | 3.396    | 138.06 |
| #1 -x+2, y+1/2, -z+3/2;#2 x+1, y, z;#3 -x+2, y-1/2, -z+1/2 |        |          |          |        |
